# Supplementary material for: Synchronous Chaos and Broad Band Gamma Rhythm in a Minimal Multi-Layer Model of Primary Visual Cortex
Source: PubMed Central journal article supplement (PMC3188510; doi:10.1371/journal.pcbi.1002176), 2011-10-06
Supplement: pcbi.1002176.s018.pdf [file pcbi.1002176.s018.pdf]

| $g_{LGN}$ (nS) | $R_0$ (Hz) | $R_1$ (Hz) | $r_0$ (Hz) | $r_1$ (Hz) |
|----------------|------------|------------|------------|------------|
| 10             | 15         | 190        | 5          | 31         |

**Table S1. Strong noise LGN input parameters.** Parameters of the LGN input to the network for the high contrast strong noise regime. See Table S3 for more details.
