# Supplementary material for: Synchronous Chaos and Broad Band Gamma Rhythm in a Minimal Multi-Layer Model of Primary Visual Cortex
Source: PubMed Central journal article supplement (PMC3188510; doi:10.1371/journal.pcbi.1002176), 2011-10-06
Supplement: pcbi.1002176.s019.pdf [file pcbi.1002176.s019.pdf]

| $C$            | 0%  | 1%  | 2%  | 4%   | 20%  | 95%  |
|----------------|-----|-----|-----|------|------|------|
| $R_0$ (Hz)     | 150 |     |     |      |      |      |
| $R_1$ (Hz)     | 0   | 430 | 690 | 1000 | 1900 | 2850 |
| $g_{LGN}$ (nS) | 1   |     |     |      |      |      |

**Table S2. Correspondence between  $C$  and  $R_0^{LGN}$  for weak noise.** Correspondences are computed approximately, assuming that each cell receives 30 independent AMPA synaptic inputs from LGN. For the response of a single LGN cell we assumed  $r_0 = 5$  Hz and  $r_1 = 48$  Hz.
