# Supplementary material for: Synchronous Chaos and Broad Band Gamma Rhythm in a Minimal Multi-Layer Model of Primary Visual Cortex
Source: PubMed Central journal article supplement (PMC3188510; doi:10.1371/journal.pcbi.1002176), 2011-10-06
Supplement: pcbi.1002176.s020.pdf [file pcbi.1002176.s020.pdf]

| $C$            | 0% | 1% | 3% | 9%  | 30% | 95% |
|----------------|----|----|----|-----|-----|-----|
| $R_0$ (Hz)     | 15 |    |    |     |     |     |
| $R_1$ (Hz)     | 0  | 30 | 60 | 100 | 140 | 190 |
| $g_{LGN}$ (nS) | 10 |    |    |     |     |     |

**Table S3. Correspondence between  $C$  and  $R_0^{LGN}$  for strong noise.** Correspondences are computed approximately, assuming that each cell receives 10 AMPA synapses from 3 independent LGN neurons. For the response of a single LGN cell we assumed  $r_0 = 5$  Hz and  $r_1 = 32$  Hz.
