# Supplementary material for: Synchronous Chaos and Broad Band Gamma Rhythm in a Minimal Multi-Layer Model of Primary Visual Cortex
Source: PLOS journal article supplement (doi:10.1371/journal.pcbi.1002176), 2011-10-06
Supplement: S21 (10.1371/journal.pcbi.1002176.s021) [file journal.pcbi.1002176.s021]

301 Moved Permanently

# Moved Permanently

The document has moved here.

---

Apache Server at www.ploscompbiol.org Port 80
